# Supplementary material for: Synthesis, Crystal Structures, Lipophilic Properties and Antimicrobial Activity of 5-Pyridylmethylidene-3-rhodanine-carboxyalkyl Acids Derivatives
Source: MDPI journal article supplement (doi:10.3390/molecules27133975), 2022-06-21
Supplement: s1 [file s1]

Supplementary Materials

# Synthesis, Crystal Structures, Lipophilic Properties and Anti-microbial Activity of 5-Pyridylmethylidene-3-Rhodanine-Carboxyalkyl Acids Derivatives

Ewa Żesławska <sup>1</sup>, Robert Zakrzewski <sup>2</sup>, Arkadiusz Nowicki <sup>2</sup>, Izabela Korona-Główniak <sup>3</sup>, Antonín Lyčka <sup>4</sup>, Agnieszka Kania <sup>1</sup>, Krzysztof Kazimierz Zborowski <sup>5</sup>, Piotr Suder <sup>6</sup>, Agnieszka Skórska-Stania <sup>5</sup> and Waldemar Tejchman <sup>1,\*</sup>

<sup>1</sup> Institute of Biology, Pedagogical University of Krakow, Podchorążych 2, 30-084 Kraków, Poland; ewa.zeslawska@up.krakow.pl (E.Ż.); agnieszka.kania@up.krakow.pl (A.K.)

<sup>2</sup> Faculty of Chemistry, University of Lodz, Tamka 12, 91-403 Łódź, Poland; robert.zakrzewski@chemia.uni.lodz.pl (R.Z.); a.nowi@o2.pl (A.N.)

<sup>3</sup> Department of Pharmaceutical Microbiology, Medical University of Lublin, Chodźki 1, 20-093 Lublin, Poland; iza.glowniak@umlub.pl

<sup>4</sup> Department of Chemistry, University of Hradec Králové, Rokitsanského 62, 500 03 Hradec Králové III, Czech Republic; antonin.lycka@uhk.cz

<sup>5</sup> Faculty of Chemistry, Jagiellonian University in Kraków, Gronostajowa 2, 30-387 Kraków, Poland; zborowsk@chemia.uj.edu.pl (K.K.Z.); agnieszka.skorska-stania@uj.edu.pl (A.S.-S.)

<sup>6</sup> Department of Analytical Chemistry and Biochemistry, Faculty of Materials Science and Ceramics, AGH University of Science and Technology, Mickiewicza 30, 30-059 Kraków, Poland; piotr.suder@agh.edu.pl

**Table S1.** Relationship between the retention factor ( $R_M$ ) and organic modifier content in the mobile phase obtained using RP-TLC.

**Table S2.** Calculated LogP values from online databases.

**Table S3.** Physicochemical properties of the tested compounds obtained *in-silico*.

**Table S4.** Bioactivity parameters of the tested compounds obtained from the Molinspiration Internet database.

**Table S5.** Antimicrobial activity of compounds /3a – 3d/.

**Table S6.** Antimicrobial activity of compounds /4a – 4d/.

**Table S7.** Antimicrobial activity of compounds /5a – 5d/.

**Table S8.** <sup>1</sup>H, <sup>13</sup>C and <sup>15</sup>N chemical shifts in compounds /3a,b,c,d – 5a,b,c,d/ in DMSO-D<sub>6</sub>.

**Table S9.** Crystal data and structure refinement for /3c/.

**Table S10.** Crystal data and structure refinement for /4a/.

**Table S11.** Crystal data and structure refinement for /5a/.

## 1. Correlation of $R_M^0$ and miLogP

**Figure S1.** Relationship between miLogP (Molinspiration) and  $R_M^0$  (RP-TLC) values.

## 2. Other correlations between experimental and *in-silico* data

**Table S12.** Regression coefficients and Pearson correlation coefficient for the relation between the values obtained *in-silico* and experimental value  $R_M^0$ .

**Table S13.** Regression coefficients and Pearson correlation coefficient for the relation between the values obtained *in-silico* and experimental value  $A$  (slope of the straight).

## 3. Correlations between *in-silico* results

**Table S14.** Values of  $R^2$  obtained by comparing *in-silico* results.

**Table S1.** Relationship between the retention factor ( $R_M$ ) and organic modifier content in the mobile phase obtained using RP-TLC.

| Organic modifier | Content of organic modifier in the mobile phase, % | Compound  | $R_M^0$ | SD $R_M^0$ | A       | SD A    | $R^2$  |
|------------------|----------------------------------------------------|-----------|---------|------------|---------|---------|--------|
| acetonitrile     | 40-100                                             | <b>3a</b> | 1.7999  | 0.2006     | -0.0251 | 0.00276 | 0.9432 |
|                  | -                                                  | <b>4a</b> | -       | -          | -       | -       | -      |
|                  | 30-90                                              | <b>5a</b> | 1.9925  | 0.2527     | -0.0283 | 0.00400 | 0.9092 |
|                  | 40-100                                             | <b>3b</b> | 2.0517  | 0.1867     | -0.0267 | 0.00256 | 0.9560 |
|                  | 30-90                                              | <b>4b</b> | 2.0458  | 0.2300     | -0.0290 | 0.00364 | 0.9273 |
|                  | 30-90                                              | <b>5b</b> | 2.2748  | 0.2403     | -0.0301 | 0.00380 | 0.9261 |
|                  | 40-100                                             | <b>3c</b> | 2.3689  | 0.2218     | -0.0290 | 0.00305 | 0.9478 |
|                  | 40-100                                             | <b>4c</b> | 1.3658  | 0.4467     | -0.0156 | 0.00614 | 0.5626 |
|                  | 40-90                                              | <b>5c</b> | 2.3507  | 0.3138     | -0.0292 | 0.00467 | 0.9073 |
|                  | 60-100                                             | <b>3d</b> | 3.2552  | 0.2318     | -0.0324 | 0.00285 | 0.9773 |
|                  | 50-100                                             | <b>4d</b> | 2.4344  | 0.3686     | -0.0207 | 0.00479 | 0.8234 |
|                  | 50-90                                              | <b>5d</b> | 3.4900  | 0.2878     | -0.0338 | 0.00403 | 0.9591 |
| methanol         | 50-100                                             | <b>3a</b> | 4.0038  | 0.2835     | -0.0453 | 0.00369 | 0.9742 |
|                  | -                                                  | <b>4a</b> | -       | -          | -       | -       | -      |
|                  | 30-100                                             | <b>5a</b> | 2.5845  | 0.0890     | -0.0307 | 0.00129 | 0.9895 |
|                  | 60-100                                             | <b>3b</b> | 4.0195  | 0.2760     | -0.0444 | 0.00340 | 0.9827 |
|                  | 50-100                                             | <b>4b</b> | 3.3383  | 0.2097     | -0.0377 | 0.00273 | 0.9796 |
|                  | 40-100                                             | <b>5b</b> | 2.9838  | 0.0874     | -0.0341 | 0.00120 | 0.9938 |
|                  | 60-100                                             | <b>3c</b> | 5.1059  | 0.4312     | -0.0555 | 0.00531 | 0.9733 |
|                  | 60-100                                             | <b>4c</b> | 3.8318  | 0.2361     | -0.0419 | 0.00291 | 0.9858 |
|                  | 50-100                                             | <b>5c</b> | 3.6553  | 0.1499     | -0.0407 | 0.00195 | 0.9909 |
|                  | 70-100                                             | <b>3d</b> | 6.2760  | 0.2458     | -0.0626 | 0.00287 | 0.9958 |
|                  | 70-100                                             | <b>4d</b> | 6.4025  | 0.3572     | -0.0637 | 0.00417 | 0.9915 |
|                  | 80-100                                             | <b>5d</b> | 5.4235  | 0.4998     | -0.0546 | 0.00553 | 0.9898 |
| acetone          | 40-100                                             | <b>3a</b> | 3.0990  | 0.2174     | -0.0405 | 0.00299 | 0.9736 |
|                  | 30-90                                              | <b>4a</b> | 2.5086  | 0.0627     | -0.0372 | 0.00099 | 0.9965 |
|                  | 30-100                                             | <b>5a</b> | 2.0087  | 0.3356     | -0.0278 | 0.00487 | 0.8444 |
|                  | 50-100                                             | <b>3b</b> | 3.0261  | 0.2339     | -0.0394 | 0.00304 | 0.9767 |
|                  | 30-100                                             | <b>4b</b> | 2.5265  | 0.2220     | -0.0347 | 0.00322 | 0.9509 |
|                  | 40-100                                             | <b>5b</b> | 2.3070  | 0.4566     | -0.0304 | 0.00627 | 0.8240 |
|                  | 50-100                                             | <b>3c</b> | 3.3633  | 0.2100     | -0.0423 | 0.00273 | 0.9836 |
|                  | 40-100                                             | <b>4c</b> | 2.8126  | 0.3352     | -0.0371 | 0.00460 | 0.9284 |
|                  | 40-100                                             | <b>5c</b> | 2.6197  | 0.4544     | -0.0334 | 0.00624 | 0.8513 |
|                  | 60-100                                             | <b>3d</b> | 4.8853  | 0.3986     | -0.0559 | 0.00491 | 0.9774 |
|                  | 60-100                                             | <b>4d</b> | 4.0406  | 0.5622     | -0.0469 | 0.00692 | 0.9387 |
|                  | 60-100                                             | <b>5d</b> | 3.3140  | 0.6482     | -0.0369 | 0.00798 | 0.8772 |
| propan-2-ol      | 30-100                                             | <b>3a</b> | 1.6422  | 0.2371     | -0.0250 | 0.00344 | 0.8978 |
|                  | -                                                  | <b>4a</b> | -       | -          | -       | -       | -      |
|                  | 30-100                                             | <b>5a</b> | 1.2167  | 0.2453     | -0.0199 | 0.00356 | 0.8391 |
|                  | 30-100                                             | <b>3b</b> | 1.8585  | 0.2632     | -0.0272 | 0.00382 | 0.8939 |
|                  | 30-100                                             | <b>4b</b> | 1.4525  | 0.2800     | -0.0217 | 0.00406 | 0.8266 |
|                  | 30-100                                             | <b>5b</b> | 1.4285  | 0.2525     | -0.0218 | 0.00366 | 0.8552 |
|                  | 30-100                                             | <b>3c</b> | 2.1034  | 0.2815     | -0.0295 | 0.00408 | 0.8966 |
|                  | 30-100                                             | <b>4c</b> | 1.7383  | 0.3068     | -0.0247 | 0.00445 | 0.8368 |
|                  | 30-100                                             | <b>5c</b> | 1.8758  | 0.3327     | -0.0267 | 0.00483 | 0.8355 |
|                  | 40-100                                             | <b>3d</b> | 3.1220  | 0.3342     | -0.0375 | 0.00459 | 0.9304 |
|                  | 40-100                                             | <b>4d</b> | 2.5721  | 0.2999     | -0.0304 | 0.00412 | 0.9161 |
|                  | 40-100                                             | <b>5d</b> | 2.5498  | 0.2467     | -0.0303 | 0.00339 | 0.9412 |
| 1,4-dioxane      | 40-100                                             | <b>3a</b> | 3.7148  | 0.2372     | -0.0555 | 0.00385 | 0.9858 |
|                  | 30-100                                             | <b>4a</b> | 2.7832  | 0.0634     | -0.0438 | 0.00110 | 0.9975 |

|        |           |        |        |         |         |        |
|--------|-----------|--------|--------|---------|---------|--------|
| 30-100 | <b>5a</b> | 2.9443 | 0.1315 | -0.0470 | 0.00191 | 0.9902 |
| 50-100 | <b>3b</b> | 3.6615 | 0.2640 | -0.0538 | 0.00400 | 0.9890 |
| 30-100 | <b>4b</b> | 3.2709 | 0.0722 | -0.0494 | 0.00105 | 0.9973 |
| 30-100 | <b>5b</b> | 3.3744 | 0.1432 | -0.0514 | 0.00208 | 0.9903 |
| 50-100 | <b>3c</b> | 3.9814 | 0.2816 | -0.0570 | 0.00427 | 0.9889 |
| 40-100 | <b>4c</b> | 3.5351 | 0.1194 | -0.0518 | 0.00164 | 0.9950 |
| 40-100 | <b>5c</b> | 3.7556 | 0.1855 | -0.0555 | 0.00255 | 0.9896 |
| 60-100 | <b>3d</b> | 5.5999 | 0.5303 | -0.0727 | 0.00752 | 0.9894 |
| 60-100 | <b>4d</b> | 5.3824 | 0.3383 | -0.0707 | 0.00416 | 0.9897 |
| 60-100 | <b>5d</b> | 5.2828 | 0.3551 | -0.0705 | 0.00437 | 0.9886 |

Table S2. Calculated LogP values from online databases.

| Compound  | Programme |        |        |        |                     |
|-----------|-----------|--------|--------|--------|---------------------|
|           | ALOGPs    | AClogP | XlogP2 | XLOGP3 | LogP <sub>ACD</sub> |
| <b>3a</b> | 2.08      | 1.49   | 0.56   | 0.56   | 0.53                |
| <b>4a</b> | 1.82      | 1.39   | 0.47   | 0.47   | 0.65                |
| <b>5a</b> | 1.84      | 1.39   | 0.47   | 0.47   | 0.40                |
| <b>3b</b> | 2.39      | 1.96   | 0.92   | 2.67   | 0.83                |
| <b>4b</b> | 2.16      | 1.85   | 0.83   | 2.63   | 0.95                |
| <b>5b</b> | 2.19      | 1.85   | 0.83   | 2.63   | 0.70                |
| <b>3c</b> | 2.78      | 2.42   | 1.28   | 3.03   | 1.06                |
| <b>4c</b> | 2.46      | 2.32   | 1.19   | 2.99   | 1.18                |
| <b>5c</b> | 2.47      | 2.32   | 1.19   | 2.99   | 0.93                |
| <b>3d</b> | 4.77      | 4.74   | 4.12   | 5.73   | 3.72                |
| <b>4d</b> | 4.54      | 4.64   | 4.03   | 5.70   | 3.84                |
| <b>5d</b> | 4.57      | 4.64   | 4.03   | 5.70   | 3.59                |

Table S3. Physicochemical properties of the tested compounds obtained *in-silico*.

| Compound  | Physicochemical properties |       |        |       |       |        |      |    |
|-----------|----------------------------|-------|--------|-------|-------|--------|------|----|
|           | miLogP                     | TPSA  | MW     | NOHBA | NOHBD | V      | NORB | NV |
| <b>3a</b> | 0.51                       | 72.20 | 308.38 | 5     | 1     | 251.63 | 5    | 0  |
| <b>4a</b> | 0.44                       | 72.20 | 308.38 | 5     | 1     | 251.63 | 5    | 0  |
| <b>5a</b> | 0.39                       | 72.20 | 308.38 | 5     | 1     | 251.63 | 5    | 0  |
| <b>3b</b> | 1.01                       | 72.20 | 322.41 | 5     | 1     | 268.43 | 6    | 0  |
| <b>4b</b> | 0.95                       | 72.20 | 322.41 | 5     | 1     | 268.43 | 6    | 0  |
| <b>5b</b> | 0.90                       | 72.20 | 322.41 | 5     | 1     | 268.43 | 6    | 0  |
| <b>3c</b> | 1.52                       | 72.20 | 336.44 | 5     | 1     | 285.23 | 7    | 0  |
| <b>4c</b> | 1.45                       | 72.20 | 336.44 | 5     | 1     | 285.23 | 7    | 0  |
| <b>5c</b> | 1.40                       | 72.20 | 336.44 | 5     | 1     | 285.23 | 7    | 0  |
| <b>3d</b> | 4.05                       | 72.20 | 406.57 | 5     | 1     | 369.24 | 12   | 0  |
| <b>4d</b> | 3.98                       | 72.20 | 406.57 | 5     | 1     | 369.24 | 12   | 0  |
| <b>5d</b> | 3.93                       | 72.20 | 406.57 | 5     | 1     | 369.24 | 12   | 0  |

**Table S4.** Bioactivity parameters of the tested compounds obtained from the Molinspiration Internet database.

| Compound  | Bioactivity parameters |                       |                  |                         |                    |                  |
|-----------|------------------------|-----------------------|------------------|-------------------------|--------------------|------------------|
|           | GPCR ligand            | Ion channel modulator | Kinase inhibitor | Nuclear receptor ligand | Protease inhibitor | Enzyme inhibitor |
| <b>3a</b> | -0.75                  | -1.60                 | -0.87            | -0.70                   | -0.56              | -0.12            |
| <b>4a</b> | -0.68                  | -1.60                 | -0.74            | -0.78                   | -0.55              | -0.12            |
| <b>5a</b> | -0.71                  | -1.61                 | -0.73            | -0.69                   | -0.48              | -0.10            |
| <b>3b</b> | -0.66                  | -1.52                 | -0.79            | -0.62                   | -0.47              | -0.10            |
| <b>4b</b> | -0.60                  | -1.52                 | -0.64            | -0.69                   | -0.46              | -0.09            |
| <b>5b</b> | -0.62                  | -1.52                 | -0.67            | -0.61                   | -0.40              | -0.07            |
| <b>3c</b> | -0.60                  | -1.45                 | -0.73            | -0.56                   | -0.41              | -0.09            |
| <b>4c</b> | -0.55                  | -1.45                 | -0.59            | -0.63                   | -0.40              | -0.09            |
| <b>5c</b> | -0.57                  | -1.46                 | -0.61            | -0.55                   | -0.34              | -0.07            |
| <b>3d</b> | -0.47                  | -1.18                 | -0.58            | -0.43                   | -0.29              | -0.08            |
| <b>4d</b> | -0.43                  | -1.18                 | -0.46            | -0.49                   | -0.28              | -0.07            |
| <b>5d</b> | -0.45                  | -1.19                 | -0.48            | -0.43                   | -0.23              | -0.06            |

**Table S5.** Antimicrobial activity of compounds /3a – 3d/.

| Chemicals<br>Microorganism        | 3a          |             | 3b          |             | 3c          |             | 3d          |             |
|-----------------------------------|-------------|-------------|-------------|-------------|-------------|-------------|-------------|-------------|
|                                   | MIC (µg/ml) | MBC (µg/ml) |
| <b>Gram-positive bacteria</b>     |             |             |             |             |             |             |             |             |
| <i>S. aureus</i> ATCC 25923       | <b>62.5</b> | >1000       | <b>62.5</b> | >1000       | <b>62.5</b> | >1000       | <b>62.5</b> | >1000       |
| <i>S. aureus</i> ATCC 6538        | <b>125</b>  | >1000       | <b>62.5</b> | >1000       | <b>62.5</b> | >1000       | <b>62.5</b> | >1000       |
| <i>S. aureus</i> ATCC 43300       | <b>62.5</b> | >1000       | <b>125</b>  | >1000       | <b>62.5</b> | >1000       | <b>62.5</b> | >1000       |
| <i>S. epidermidis</i> ATCC 12228  | <b>125</b>  | >1000       | <b>62.5</b> | >1000       | <b>62.5</b> | >1000       | <b>31.3</b> | >1000       |
| <i>M. luteus</i> ATCC 10240       | <b>125</b>  | >1000       | <b>62.5</b> | >1000       | <b>125</b>  | >1000       | <b>7.8</b>  | <b>7.8</b>  |
| <i>B. subtilis</i> ATCC 6633      | <b>62.5</b> | >1000       | <b>62.5</b> | >1000       | <b>31.3</b> | >1000       | <b>125</b>  | >1000       |
| <i>B. cereus</i> ATCC 10876       | <b>125</b>  | >1000       | <b>62.5</b> | >1000       | <b>31.3</b> | >1000       | <b>62.5</b> | >1000       |
| <i>S. pyogenes</i> ATCC 19615     | 500         | >1000       | >1000       | >1000       | >1000       | >1000       | 1000        | >1000       |
| <i>S. pneumoniae</i> ATCC 49619   | 1000        | >1000       | >1000       | >1000       | >1000       | >1000       | >1000       | >1000       |
| <i>S. mutans</i> ATCC 25175       | 500         | >1000       | >1000       | >1000       | >1000       | >1000       | >1000       | >1000       |
| <b>Gram-negative bacteria</b>     |             |             |             |             |             |             |             |             |
| <i>S. typhimurium</i> ATCC 14028  | >1000       | >1000       | >1000       | >1000       | >1000       | >1000       | >1000       | >1000       |
| <i>E. coli</i> ATCC 25922         | >1000       | >1000       | >1000       | >1000       | >1000       | >1000       | >1000       | >1000       |
| <i>P. mirabilis</i> ATCC 12453    | 250         | >1000       | >1000       | >1000       | >1000       | >1000       | 250         | >1000       |
| <i>K. pneumoniae</i> ATCC 13883   | 250         | >1000       | >1000       | >1000       | >1000       | >1000       | >1000       | >1000       |
| <i>P. aeruginosa</i> ATCC 9027    | >1000       | >1000       | >1000       | >1000       | >1000       | >1000       | 125         | >1000       |
| <b>Yeasts</b>                     |             |             |             |             |             |             |             |             |
| <i>C. albicans</i> ATCC 102231    | >1000       | >1000       | >1000       | >1000       | 500         | >1000       | >1000       | >1000       |
| <i>C. albicans</i> ATCC 2091      | >1000       | >1000       | 1000        | >1000       | 125         | >1000       | >1000       | >1000       |
| <i>C. parapsilosis</i> ATCC 22019 | >1000       | >1000       | >1000       | >1000       | 125         | >1000       | >1000       | >1000       |
| <i>C. glabrata</i> ATCC 90030     | >1000       | >1000       | >1000       | >1000       | 500         | >1000       | >1000       | >1000       |
| <i>C. krusei</i> ATCC 14243       | >1000       | >1000       | 500         | >1000       | 500         | >1000       | >1000       | >1000       |



|                                   |       |       |       |       |       |       |       |       |       |
|-----------------------------------|-------|-------|-------|-------|-------|-------|-------|-------|-------|
| <i>S. typhimurium</i> ATCC 14028  | >1000 | >1000 | >1000 | >1000 | >1000 | >1000 | >1000 | >1000 | >1000 |
| <i>E. coli</i> ATCC 25922         | >1000 | >1000 | >1000 | >1000 | >1000 | >1000 | >1000 | >1000 | >1000 |
| <i>P. mirabilis</i> ATCC 12453    | >1000 | >1000 | >1000 | >1000 | >1000 | >1000 | >1000 | >1000 | >1000 |
| <i>K. pneumoniae</i> ATCC 13883   | >1000 | >1000 | >1000 | >1000 | >1000 | >1000 | >1000 | >1000 | >1000 |
| <i>P. aeruginosa</i> ATCC 9027    | >1000 | >1000 | >1000 | >1000 | >1000 | >1000 | >1000 | 125   | >1000 |
| <b>Yeasts</b>                     |       |       |       |       |       |       |       |       |       |
| <i>C. albicans</i> ATCC 102231    | 500   | >1000 | 1000  | >1000 | 500   | >1000 | >1000 | >1000 | >1000 |
| <i>C. albicans</i> ATCC 2091      | 500   | >1000 | 250   | >1000 | 1000  | >1000 | >1000 | >1000 | >1000 |
| <i>C. parapsilosis</i> ATCC 22019 | 1000  | >1000 | >1000 | >1000 | 1000  | >1000 | >1000 | >1000 | >1000 |
| <i>C. glabrata</i> ATCC 90030     | 500   | >1000 | >1000 | >1000 | >1000 | >1000 | 1000  | >1000 | >1000 |
| <i>C. krusei</i> ATCC 14243       | >1000 | >1000 | >1000 | >1000 | >1000 | >1000 | 1000  | >1000 | >1000 |

Table S8.  $^1\text{H}$ ,  $^{13}\text{C}$  and  $^{15}\text{N}$  chemical shifts in compounds /3a,b,c,d – 5a,b,c,d/ in DMSO- $\text{D}_6$ .

|                  | 3a                  | 4a                  | 5a                  | 3b                  | 4b                  | 5b                  | 3c                  | 4c                  | 5c                  | 3d                  | 4d                  | 5d                  |
|------------------|---------------------|---------------------|---------------------|---------------------|---------------------|---------------------|---------------------|---------------------|---------------------|---------------------|---------------------|---------------------|
| C=S              | -200.1              | -193.4              | -193.4              | -199.9              | -193.2              | -193.2              | -199.8              | -193.2              | -193.1              | -199.8              | -192.9              | -193.1              |
| N                | -186.7 <sup>a</sup> | -186.1 <sup>a</sup> | -186.6 <sup>a</sup> | -185.8 <sup>a</sup> | -185.9 <sup>a</sup> | -185.8 <sup>a</sup> | -185.4 <sup>a</sup> | -185.3 <sup>a</sup> | -185.3 <sup>a</sup> | -185.3 <sup>a</sup> | -185.3 <sup>a</sup> | -185.6 <sup>a</sup> |
| NCH <sub>2</sub> | 4.07/43.2           | 4.08/43.8           | 4.07/43.9           | 4.03/43.4           | 4.04/44.1           | 4.03/44.1           | 4.01/43.6           | 4.02/44.2           | 4.01/44.3           | 4.00/43.7           | 3.98/44.3           | 4.01/44.4           |
| CH <sub>2</sub>  | 1.88/22.1           | 1.91/22.0           | 1.88/22.0           | 1.65/21.8           | 1.67/21.7           | 1.66/21.7           | 1.64/26.2           | 1.64/26.1           | 1.64/26.1           | 1.61/26.4           | 1.60/26.3           | 1.63/26.2           |
| CH <sub>2</sub>  | -                   | -                   | -                   | -                   | -                   | -                   | 1.29/25.7           | 1.29/25.7           | 1.29/25.7           | b                   | c                   | d                   |
| CH <sub>2</sub>  | -                   | -                   | -                   | 1.51/26.1           | 1.52/26.0           | 1.51/26.0           | 1.52/24.1           | 1.52/24.1           | 1.53/24.0           | 1.45/24.5           | 1.45/24.5           | 1.47/24.5           |
| CH <sub>2</sub>  | 2.29/31.0           | 2.30/31.0           | 2.31/31.0           | 2.25/33.1           | 2.24/33.1           | 2.22/33.1           | 2.20/33.4           | 2.20/33.4           | 2.20/33.4           | 2.16/33.7           | 2.15/33.7           | 2.17/33.7           |
| COOH             | 12.14/173.12        | 12.13/173.12        | 12.15/173.12        | 12.07/174.12        | 12.07/174.12        | 12.07/174.12        | 12.02/174.12        | 12.05/174.12        | 12.02/174.11        | 11.79/174.11        | 11.98/174.11        | 11.97/174.11        |
|                  | 8                   | 8                   | 8                   | 2                   | 2                   | 2                   | 4                   | 4                   | 4                   | 5                   | 5                   | 5                   |
| C=O              | -167.2              | -167.0              | -167.0              | -167.1              | -168.6              | -166.8              | -167.1              | -166.8              | -166.8              | -167.1              | -166.7              | -166.8              |
| C=               | -126.9              | -124.8              | -127.7              | -126.7              | -124.7              | -127.6              | -126.7              | -124.7              | -127.5              | -128.5              | -124.6              | -127.5              |
| =CH-             | 7.82/128.47         | 8.84/129.27         | 7.75/129.27         | 8.84/128.67         | 8.86/129.57         | 7.78/129.57         | 8.85/128.67         | 8.87/129.57         | 7.78/129.57         | 8.82/128.57         | 8.81/129.47         | 7.78/129.57         |
| N                | -68.9 <sup>a</sup>  | -63.5 <sup>a</sup>  | -59.8 <sup>a</sup>  | -68.8 <sup>a</sup>  | -63.2 <sup>a</sup>  | -58.0 <sup>a</sup>  | -68.8 <sup>a</sup>  | -63.2 <sup>a</sup>  | -59.1 <sup>a</sup>  | -68.6 <sup>a</sup>  | -63.5 <sup>a</sup>  | -58.8 <sup>a</sup>  |
| 2                | -151.2              | 8.88/151.98         | 8.73/150.8          | -151.2              | 8.88/151.98         | 8.74/150.8          | -151.2              | 8.89/151.98         | 8.74/150.8          | -151.2              | 8.84/151.98         | 8.74/150.8          |
| 3                | 7.93/128.3          | -129.2              | 7.57/123.77         | 9.93/128.3          | -129.2              | 7.57/123.77         | 9.94/128.3          | -129.2              | 7.57/123.77         | 9.93/128.3          | -129.1              | 7.57/123.7          |
| 4                | 7.96/137.77         | 9.98/136.5          | -140.0              | 7.97/137.77         | 9.99/136.5          | -139.9              | 7.97/137.7          | 7.99/136.5          | -139.9              | 7.96/137.77         | 9.94/136.5          | -139.9              |
| 5                | 7.45/124.27         | 5.58/124.47         | 5.57/123.77         | 4.6/124.27          | 5.58/124.47         | 5.57/123.77         | 4.6/124.27          | 5.59/124.47         | 5.57/123.77         | 4.4/124.27          | 5.55/124.37         | 5.57/123.7          |
| 6                | 8.80/149.68         | 6.62/150.98         | 8.73/150.88         | 8.81/149.68         | 6.64/150.98         | 8.74/150.88         | 8.81/149.68         | 6.66/151.08         | 8.74/150.88         | 7.9/149.58          | 6.63/150.98         | 8.74/150.8          |

<sup>a</sup>  $^{15}\text{N}$ <sup>b</sup>  $^1\text{H}$  = 1.13–1.28 (12H, m), ( $^{13}\text{C}$ ) = 28.85, 28.81, 28.76, 28.57, 28.55, 26.17<sup>c</sup>  $^1\text{H}$  = 1.14–1.28 (12H, m), ( $^{13}\text{C}$ ) = 28.90, 28.86, 28.81, 28.61, 28.59, 26.19<sup>d</sup>  $^1\text{H}$  = 1.14–1.28 (12H, m), ( $^{13}\text{C}$ ) = 28.84, 28.78, 28.75, 28.55, 28.53, 26.24

**Table S9.** Crystal data and structure refinement for /3c/.

| Empirical formula                 | $C_{15}H_{16}N_2O_3S_2$                     |                            |
|-----------------------------------|---------------------------------------------|----------------------------|
| Formula weight                    | 336.42                                      |                            |
| Temperature                       | 130(2) K                                    |                            |
| Wavelength                        | 0.71073 Å                                   |                            |
| Crystal system                    | Triclinic                                   |                            |
| Space group                       | P -1                                        |                            |
| Unit cell dimensions              | a = 5.0766(3) Å                             | $\alpha = 98.784(5)^\circ$ |
|                                   | b = 12.3912(8) Å                            | $\beta = 93.967(5)^\circ$  |
|                                   | c = 12.6046(8) Å                            | $\gamma = 90.083(5)^\circ$ |
| Volume                            | 781.66(9) Å <sup>3</sup>                    |                            |
| Z                                 | 2                                           |                            |
| Density (calculated)              | 1.429 Mg/m <sup>3</sup>                     |                            |
| Absorption coefficient            | 0.354 mm <sup>-1</sup>                      |                            |
| F(000)                            | 352                                         |                            |
| Crystal size                      | 0.520 x 0.200 x 0.030 mm <sup>3</sup>       |                            |
| Theta range for data collection   | 2.508 to 27.987°                            |                            |
| Index ranges                      | -6 ≤ h ≤ 6, -15 ≤ k ≤ 16, -16 ≤ l ≤ 16      |                            |
| Reflections collected             | 10738                                       |                            |
| Independent reflections           | 3716 [R(int) = 0.0386]                      |                            |
| Completeness to theta = 25.242°   | 99.8 %                                      |                            |
| Refinement method                 | Full-matrix least-squares on F <sup>2</sup> |                            |
| Data / restraints / parameters    | 3716 / 0 / 203                              |                            |
| Goodness-of-fit on F <sup>2</sup> | 1.138                                       |                            |
| Final R indices [I > 2σ(I)]       | R1 = 0.0497, wR2 = 0.1171                   |                            |
| R indices (all data)              | R1 = 0.0706, wR2 = 0.1274                   |                            |
| Extinction coefficient            | n/a                                         |                            |
| Largest diff. peak and hole       | 0.457 and -0.299 e.Å <sup>-3</sup>          |                            |

**Table S10.** Crystal data and structure refinement for /4a/.

| Empirical formula                 | $C_{13}H_{12}N_2O_3S_2$                     |                            |
|-----------------------------------|---------------------------------------------|----------------------------|
| Formula weight                    | 308.37                                      |                            |
| Temperature                       | 130(2) K                                    |                            |
| Wavelength                        | 0.71073 Å                                   |                            |
| Crystal system                    | Triclinic                                   |                            |
| Space group                       | P -1                                        |                            |
| Unit cell dimensions              | a = 5.3749(3) Å                             | $\alpha = 73.323(6)^\circ$ |
|                                   | b = 9.8192(6) Å                             | $\beta = 78.924(5)^\circ$  |
|                                   | c = 13.1564(9) Å                            | $\gamma = 82.765(7)^\circ$ |
| Volume                            | 650.91(7) Å <sup>3</sup>                    |                            |
| Z                                 | 2                                           |                            |
| Density (calculated)              | 1.573 Mg/m <sup>3</sup>                     |                            |
| Absorption coefficient            | 0.417 mm <sup>-1</sup>                      |                            |
| F(000)                            | 320                                         |                            |
| Crystal size                      | 0.310 x 0.110 x 0.030 mm <sup>3</sup>       |                            |
| Theta range for data collection   | 3.053 to 28.691°                            |                            |
| Index ranges                      | -7 ≤ h ≤ 7, -13 ≤ k ≤ 12, -17 ≤ l ≤ 16      |                            |
| Reflections collected             | 8719                                        |                            |
| Independent reflections           | 3050 [R(int) = 0.0372]                      |                            |
| Completeness to theta = 25.242°   | 99.8 %                                      |                            |
| Refinement method                 | Full-matrix least-squares on F <sup>2</sup> |                            |
| Data / restraints / parameters    | 3050 / 0 / 185                              |                            |
| Goodness-of-fit on F <sup>2</sup> | 1.071                                       |                            |

|                                      |                                    |
|--------------------------------------|------------------------------------|
| Final R indices [ $I > 2\sigma(I)$ ] | R1 = 0.0408, wR2 = 0.1016          |
| R indices (all data)                 | R1 = 0.0536, wR2 = 0.1090          |
| Extinction coefficient               | n/a                                |
| Largest diff. peak and hole          | 0.483 and -0.330 e.Å <sup>-3</sup> |

**Table S11.** Crystal data and structure refinement for /5a/.

|                                      |                                                                            |                           |
|--------------------------------------|----------------------------------------------------------------------------|---------------------------|
| <b>Empirical formula</b>             | <b>C<sub>13</sub>H<sub>12</sub>N<sub>2</sub>O<sub>3</sub>S<sub>2</sub></b> |                           |
| Formula weight                       | 308.37                                                                     |                           |
| Temperature                          | 293(2) K                                                                   |                           |
| Wavelength                           | 0.71073 Å                                                                  |                           |
| Crystal system                       | Monoclinic                                                                 |                           |
| Space group                          | P 21/c                                                                     |                           |
| Unit cell dimensions                 | a = 11.5626(2) Å                                                           | $\alpha = 90^\circ$       |
|                                      | b = 7.9659(2) Å                                                            | $\beta = 90.169(2)^\circ$ |
|                                      | c = 14.5520(3) Å                                                           | $\gamma = 90^\circ$       |
| Volume                               | 1340.33(5) Å <sup>3</sup>                                                  |                           |
| Z                                    | 4                                                                          |                           |
| Density (calculated)                 | 1.528 Mg/m <sup>3</sup>                                                    |                           |
| Absorption coefficient               | 0.405 mm <sup>-1</sup>                                                     |                           |
| F(000)                               | 640                                                                        |                           |
| Crystal size                         | 0.31 x 0.25 x 0.05 mm <sup>3</sup>                                         |                           |
| Theta range for data collection      | 2.799 to 28.693°                                                           |                           |
| Index ranges                         | -15 ≤ h ≤ 15, -10 ≤ k ≤ 10, -19 ≤ l ≤ 19                                   |                           |
| Reflections collected                | 56894                                                                      |                           |
| Independent reflections              | 3370 [R(int) = 0.0459]                                                     |                           |
| Completeness to theta = 25.242°      | 99.9 %                                                                     |                           |
| Refinement method                    | Full-matrix least-squares on F <sup>2</sup>                                |                           |
| Data / restraints / parameters       | 3370 / 0 / 185                                                             |                           |
| Goodness-of-fit on F <sup>2</sup>    | 1.039                                                                      |                           |
| Final R indices [ $I > 2\sigma(I)$ ] | R1 = 0.0297, wR2 = 0.0707                                                  |                           |
| R indices (all data)                 | R1 = 0.0376, wR2 = 0.0762                                                  |                           |
| Extinction coefficient               | n/a                                                                        |                           |
| Largest diff. peak and hole          | 0.331 and -0.227 e.Å <sup>-3</sup>                                         |                           |

### 1. Correlation of R<sub>M</sub><sup>0</sup> and miLogP

Twelve miLogP values calculated using Molinspiration internet database were correlated with R<sub>M</sub><sup>0</sup> values obtained experimentally. Correlation charts for all tested solvents are shown in Figure S1.



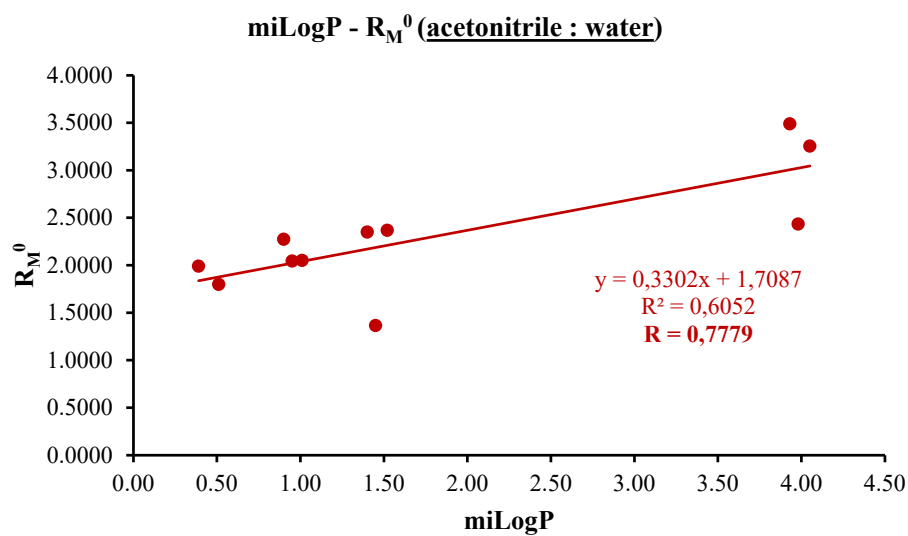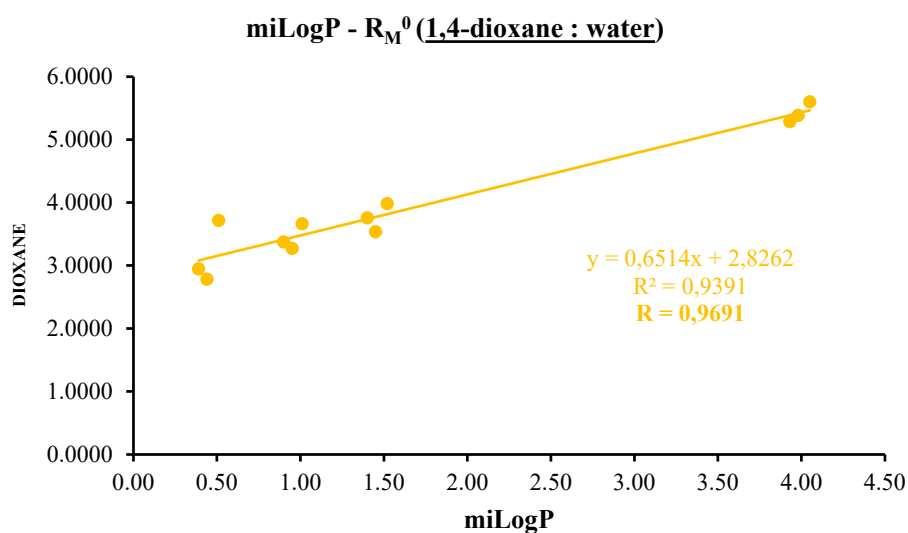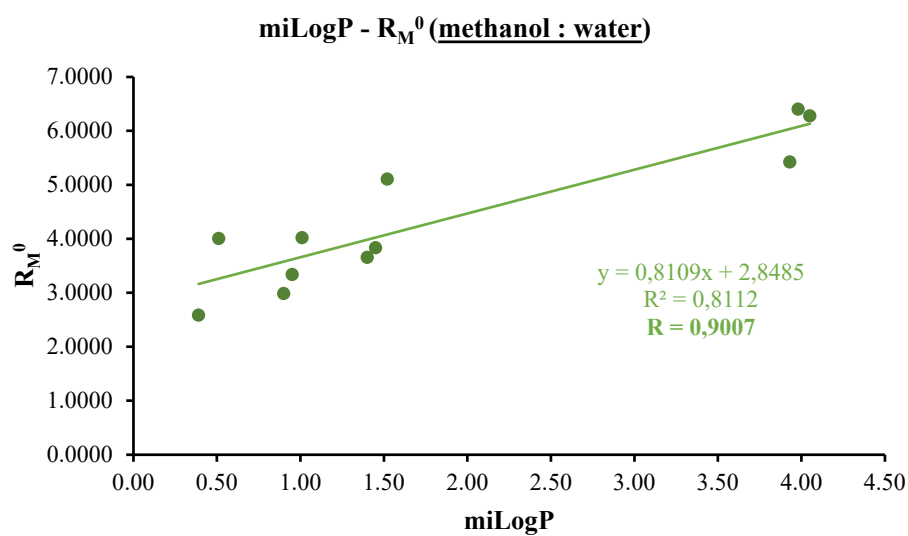

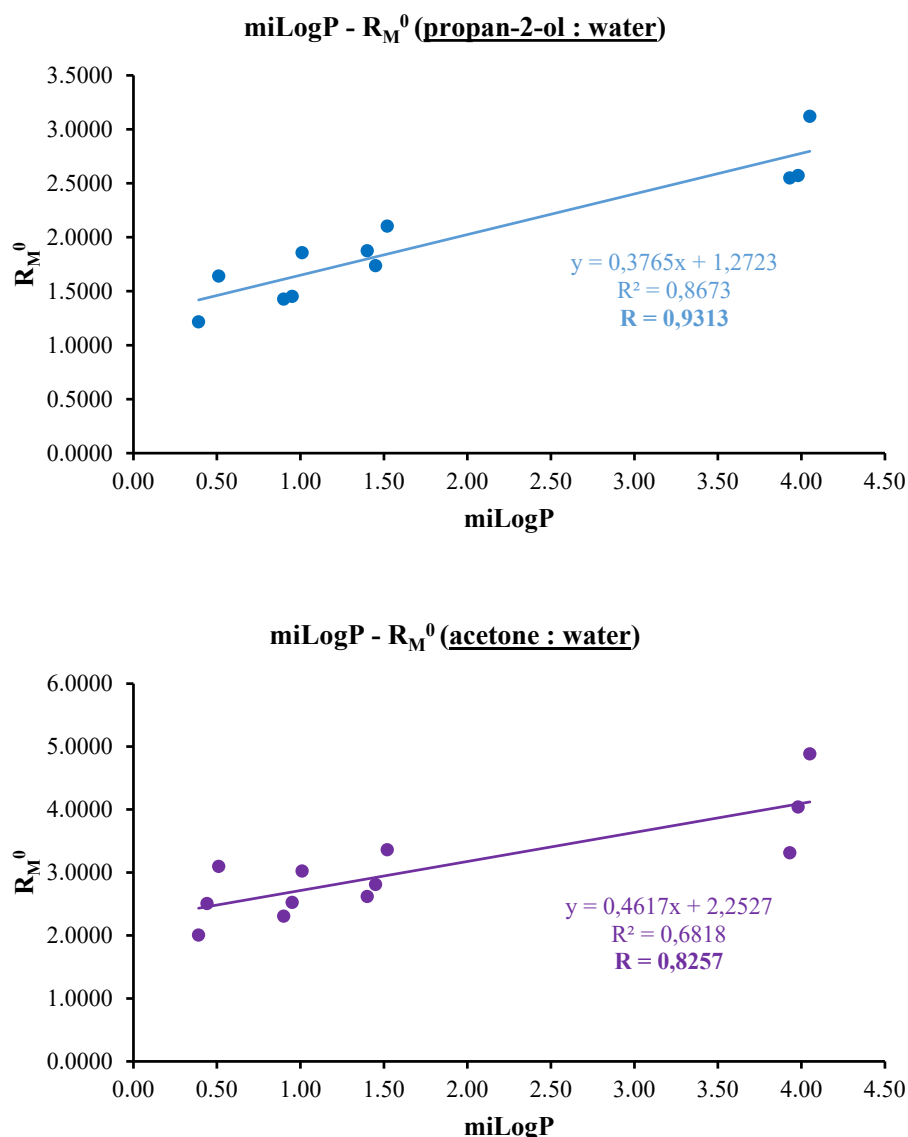

**Figure S1.** Relationship between miLogP (Molinspiration) and  $R_M^0$  (RP-TLC) values.

All organic modifiers of the mobile phase show significantly statistical relationships and correlate with each other. The highest value of Pearson R coefficient was observed for the organic modifier 1,4-dioxane and the lowest one for acetonitrile and it is 0.9691 and 0.7779, respectively. A very high positive correlation is visible for modifiers such as 1,4-dioxane, methanol and propan-2-ol (Pearson's R-factor > 0.9000) and a high correlation for modifiers such as acetonitrile and acetone ( $0.7000 < R < 0.9000$ ). [1]

It can be observed that all compounds in each diagram are arranged into four groups depending on the length of alkyl chain in the molecular structure.

## 2. Other correlations between experimental and *in-silico* data

Calculated theoretically five LogP values [2-6] were correlated with experimental values such as  $R_M^0$  and the slope coefficient of straight  $a$  (equation 3). The results obtained (regression coefficients  $a$ ,  $b$ ,  $R^2$  and Pearson's coefficient  $R$ ) are shown in Table S12 and Table S13.

**Table S12.** Regression coefficients and Pearson correlation coefficient for the relation between the values obtained *in-silico* and experimental value  $R_m^0$ .

| $R_m^0 = a \cdot \text{LogP} + b$ |                         |              |          |         |             |             |
|-----------------------------------|-------------------------|--------------|----------|---------|-------------|-------------|
| Programme                         | Regression coefficients | acetonitrile | methanol | acetone | propan-2-ol | 1,4-dioxane |
| ALOGPs                            | <i>a</i>                | 0.4364       | 1.0627   | 0.6118  | 0.4919      | 0.8452      |
|                                   | <i>b</i>                | 1.0324       | 1.2140   | 1.3056  | 0.5178      | 1.5409      |
|                                   | $R^2$                   | 0.6421       | 0.8465   | 0.7308  | 0.8994      | 0.9652      |
|                                   | <i>R</i>                | 0.8013       | 0.9200   | 0.8549  | 0.9484      | 0.9824      |
| AClogP                            | <i>a</i>                | 0.3636       | 0.8845   | 0.5027  | 0.4118      | 0.7107      |
|                                   | <i>b</i>                | 1.3327       | 1.9478   | 1.7437  | 0.8511      | 2.1039      |
|                                   | $R^2$                   | 0.6162       | 0.8106   | 0.6814  | 0.8713      | 0.9428      |
|                                   | <i>R</i>                | 0.7850       | 0.9003   | 0.8255  | 0.9334      | 0.9710      |
| XlogP2                            | <i>a</i>                | 0.3227       | 0.7694   | 0.4439  | 0.3574      | 0.6286      |
|                                   | <i>b</i>                | 1.7411       | 2.9691   | 2.3058  | 1.3280      | 2.8970      |
|                                   | $R^2$                   | 0.6282       | 0.7937   | 0.6743  | 0.8492      | 0.9360      |
|                                   | <i>R</i>                | 0.7926       | 0.8909   | 0.8212  | 0.9215      | 0.9675      |
| XLOGP3                            | <i>a</i>                | 0.3356       | 0.7975   | 0.4582  | 0.3706      | 0.6535      |
|                                   | <i>b</i>                | 1.1323       | 1.5267   | 1.4794  | 0.6574      | 1.7108      |
|                                   | $R^2$                   | 0.6246       | 0.7840   | 0.6600  | 0.8396      | 0.9293      |
|                                   | <i>R</i>                | 0.7903       | 0.8854   | 0.8124  | 0.9163      | 0.9640      |
| LogP <sub>ACD</sub>               | <i>a</i>                | 0.3350       | 0.8365   | 0.4880  | 0.3830      | 0.6814      |
|                                   | <i>b</i>                | 1.7718       | 2.9812   | 2.2952  | 1.3427      | 2.8968      |
|                                   | $R^2$                   | 0.5706       | 0.7911   | 0.6717  | 0.8221      | 0.9064      |
|                                   | <i>R</i>                | 0.7554       | 0.8894   | 0.8196  | 0.9067      | 0.9521      |

Pearson correlation coefficient for the relation between the values obtained *in-silico* and experimental value  $R_m^0$  are greater than or equal to 0.7554, which means that the correlation between the results is positively high or positively very high. The highest value was obtained for the modifier 1,4-dioxane in ALOGPs and the lowest value for the acetonitrile modifier in LogP<sub>ACD</sub> and they are 0.9824 and 0.7554, respectively. The highest values of *R* coefficient were obtained for the modifier 1,4-dioxane in all programs and fall within the scope 0.9521–0.9824. Equally high values can be observed for propan-2-ol. The lowest values were obtained for acetonitrile and fall within the scope 0.7554–0.8013.

**Table S13.** Regression coefficients and Pearson correlation coefficient for the relation between the values obtained *in-silico* and experimental value *A* (slope of the straight).

| $A \text{ (experimental)} = a \cdot \text{LogP} + b$ |                         |              |          |         |             |             |
|------------------------------------------------------|-------------------------|--------------|----------|---------|-------------|-------------|
| Programme                                            | Regression coefficients | acetonitrile | methanol | acetone | propan-2-ol | 1,4-dioxane |
| ALOGPs                                               | <i>a</i>                | -0.0009      | -0.0088  | -0.0048 | -0.0388     | -0.0084     |
|                                                      | <i>b</i>                | -0.0246      | -0.0207  | -0.0249 | -0.0154     | -0.0327     |
|                                                      | $R^2$                   | 0.0391       | 0.7725   | 0.5053  | 0.7389      | 0.9427      |
|                                                      | <i>R</i>                | 0.1977       | 0.8789   | 0.7108  | 0.8596      | 0.9709      |
| AClogP                                               | <i>a</i>                | -0.0007      | -0.0073  | -0.0039 | -0.0032     | -0.0071     |
|                                                      | <i>b</i>                | -0.0255      | -0.0269  | -0.0285 | -0.0181     | -0.0384     |
|                                                      | $R^2$                   | 0.0278       | 0.7305   | 0.4568  | 0.6976      | 0.9177      |
|                                                      | <i>R</i>                | 0.1667       | 0.8547   | 0.6759  | 0.8352      | 0.9580      |
| XlogP2                                               | <i>a</i>                | -0.0006      | -0.0063  | -0.0034 | -0.0028     | -0.0063     |
|                                                      | <i>b</i>                | -0.0261      | -0.0353  | -0.0328 | -0.0219     | -0.0462     |
|                                                      | $R^2$                   | 0.0335       | 0.7106   | 0.4535  | 0.6682      | 0.9112      |
|                                                      | <i>R</i>                | 0.1830       | 0.8430   | 0.6734  | 0.8174      | 0.9546      |
| XLOGP3                                               | <i>a</i>                | -0.0007      | -0.0065  | -0.0035 | -0.0028     | -0.0065     |
|                                                      | <i>b</i>                | -0.0250      | -0.0236  | -0.0265 | -0.0168     | -0.0345     |
|                                                      | $R^2$                   | 0.0319       | 0.6997   | 0.4395  | 0.6554      | 0.9040      |

|                     |                       |         |         |         |         |         |
|---------------------|-----------------------|---------|---------|---------|---------|---------|
|                     | <i>R</i>              | 0.1786  | 0.8365  | 0.6629  | 0.8096  | 0.9508  |
| LogP <sub>ACD</sub> | <i>a</i>              | -0.0005 | -0.0068 | -0.0038 | -0.0029 | -0.0067 |
|                     | <i>b</i>              | -0.0264 | -0.0355 | -0.0327 | -0.0221 | -0.0463 |
|                     | <i>R</i> <sup>2</sup> | 0.0183  | 0.7064  | 0.4686  | 0.6331  | 0.8736  |
|                     | <i>R</i>              | 0.1353  | 0.8405  | 0.6845  | 0.7957  | 0.9361  |

The Pearson correlation coefficient for the relationship between the values obtained *in-silico* and the experimental value *a* (straight slope) varies according to the organic mobile phase modifier used. Negligible correlation was obtained for acetonitrile ( $R < 0.3000$ ). Moderate positive correlation is visible for most programs when the organic modifier was acetone ( $0.5000 < R < 0.7000$ ). Other results in all programs are high positive or very high correlation. The highest values of Pearson *R* were again obtained for 1,4-dioxane and are in the range 0.9361–0.9709.

### 3. Correlations between in-silico results

Statistical analysis of all LogP values obtained theoretically for all programs and the Molinspiration Internet database was also carried out. All results were compared with each other and *R*<sup>2</sup> coefficients were calculated. The results are presented in Table S14.

**Table S14.** Values of *R*<sup>2</sup> obtained by comparing in-silico results.

|           |                     | Programme |        |        |        |        |                     |
|-----------|---------------------|-----------|--------|--------|--------|--------|---------------------|
|           |                     | miLogP    | ALOGPs | AClogP | XlogP2 | XLOGP3 | LogP <sub>ACD</sub> |
| Programme | miLogP              | 1         | –      | –      | –      | –      | –                   |
|           | ALOGPs              | 0.9911    | 1      | –      | –      | –      | –                   |
|           | AClogP              | 0.9997    | 0.9924 | 1      | –      | –      | –                   |
|           | XlogP2              | 0.9928    | 0.9916 | 0.9928 | 1      | –      | –                   |
|           | XLOGP3              | 0.9934    | 0.9889 | 0.9932 | 0.9996 | 1      | –                   |
|           | LogP <sub>ACD</sub> | 0.9810    | 0.9748 | 0.9782 | 0.9916 | 0.9918 | 1                   |

Each LogP value determination program uses different algorithms to calculate this value, however, there is a very high correlation between the results obtained. Correlation coefficients *R*<sup>2</sup> are greater than or equal to 0.9748, which indicates that each software can be successfully used for preliminary assessment of lipophilicity of the analyzed compounds.

## References

1. Mukaka, M.M. A guide to appropriate use of correlation coefficient in medical research. *Malawi Med. J.* **2012**, *24*, 69–71.
2. Available online: <http://www.vcclab.org/lab/alogps/>
3. Available online: <https://www.organic-chemistry.org/prog/peo/>
4. Available online: <https://www.ics.uci.edu/~dock/manuals/xlogp2.1/>
5. Available online: <http://www.sioc-ccbg.ac.cn/skins/ccbgwebsite/software/xlogp3/>
6. Available online: <https://www.acdlabs.com/>
